# Supplementary material
Source: MDPI journal article supplement (https://www.mdpi.com/2073-4433/11/2/172)
Supplement: s1 [file s1]

# Supplementary Material for Characterization of Aerosol Physical and Optical Properties at The Observatoire Pérenne de l'Environnement (OPE) Site

Antoine Farah <sup>1,\*</sup>, Paolo Villani <sup>1</sup>, Clemence Rose <sup>1</sup>, Sebastien Conil <sup>2</sup>, Laurent Langrene <sup>2</sup>, Paolo Laj <sup>3</sup> and Karine Sellegri <sup>1,\*</sup>

<sup>1</sup> Laboratoire de Météorologie Physique, UMR6016, Université Clermont Auvergne-CNRS, 4 avenue Blaise Pascal, 63178 Aubière, France; p.villani@opgc.fr (P.V.); c.rose@opgc.univ-bpclermont.fr (C.R.)

<sup>2</sup> ANDRA-DRD, Observatoire Pérenne de l'Environnement, F-55290 Bure, France; Sebastien.Conil@andra.fr (S.C.); Laurent.LANGRENE@andra.fr (L.L.)

<sup>3</sup> Institut des Géosciences de l'Environnement, Université Grenoble Alpes, Centre National de la Recherche Scientifique, 38000 Grenoble, France; paolo.laj@univ-grenoble-alpes.fr (P.L.)

\* Correspondence: anfarah90@gmail.com (A.F.); karine.sellegri@uca.fr; (K.S.) Tel.: +33-473-407-678 (A.F.); Tel.: +33-473-407-394 (K.S.)

**Table 1.** Median values of different aerosol optical and physical properties at OPE as a function of seasons.

|                                                                 | Full Period               | Winter                     | Spring                    | Summer                    | Autumn                    |
|-----------------------------------------------------------------|---------------------------|----------------------------|---------------------------|---------------------------|---------------------------|
| <b>EBC (<math>\mu\text{g m}^{-3}</math>)</b>                    | Median = 0.3              | Median = 0.32              | Median = 0.24             | Median = 0.25             | Median = 0.34             |
|                                                                 | Perc <sub>25</sub> = 0.17 | Perc <sub>25</sub> = 0.18  | Perc <sub>25</sub> = 0.16 | Perc <sub>25</sub> = 0.17 | Perc <sub>25</sub> = 0.21 |
|                                                                 | Perc <sub>75</sub> = 0.47 | Perc <sub>75</sub> = 0.56  | Perc <sub>75</sub> = 0.41 | Perc <sub>75</sub> = 0.37 | Perc <sub>75</sub> = 0.54 |
| <b>EBC<sub>bb</sub> (<math>\mu\text{g m}^{-3}</math>)</b>       | Median = 0.09             | Median = 0.12              | Median = 0.08             | Median = 0.05             | Median = 0.1              |
|                                                                 | Perc <sub>25</sub> = 0.04 | Perc <sub>25</sub> = 0.06  | Perc <sub>25</sub> = 0.04 | Perc <sub>25</sub> = 0.02 | Perc <sub>25</sub> = 0.05 |
|                                                                 | Perc <sub>75</sub> = 0.16 | Perc <sub>75</sub> = 0.2   | Perc <sub>75</sub> = 0.15 | Perc <sub>75</sub> = 0.1  | Perc <sub>75</sub> = 0.18 |
| <b>EBC<sub>ff</sub> (<math>\mu\text{g m}^{-3}</math>)</b>       | Median = 0.24             | Median = 0.2               | Median = 0.2              | Median = 0.27             | Median = 0.3              |
|                                                                 | Perc <sub>25</sub> = 0.13 | Perc <sub>25</sub> = 0.11  | Perc <sub>25</sub> = 0.12 | Perc <sub>25</sub> = 0.15 | Perc <sub>25</sub> = 0.17 |
|                                                                 | Perc <sub>75</sub> = 0.4  | Perc <sub>75</sub> = 0.35  | Perc <sub>75</sub> = 0.34 | Perc <sub>75</sub> = 0.4  | Perc <sub>75</sub> = 0.47 |
| <b><math>\alpha</math></b>                                      | Median = 0.95             | Median = 1.03              | Median = 0.96             | Median = 0.8              | Median = 0.9              |
|                                                                 | Perc <sub>25</sub> = 0.76 | Perc <sub>25</sub> = 0.93  | Perc <sub>25</sub> = 0.78 | Perc <sub>25</sub> = 0.62 | Perc <sub>25</sub> = 0.72 |
|                                                                 | Perc <sub>75</sub> = 1.11 | Perc <sub>75</sub> = 1.14  | Perc <sub>75</sub> = 1.11 | Perc <sub>75</sub> = 1.02 | Perc <sub>75</sub> = 1.09 |
| <b><math>b_{scat}</math> (<math>\text{Mm}^{-1}</math>)</b>      | Median = 19               | Median = 24                | Median = 19               | Median = 14               | Median = 21               |
|                                                                 | Perc <sub>25</sub> = 11   | Perc <sub>25</sub> = 13    | Perc <sub>25</sub> = 10   | Perc <sub>25</sub> = 10   | Perc <sub>25</sub> = 12   |
|                                                                 | Perc <sub>75</sub> = 41   | Perc <sub>75</sub> = 53    | Perc <sub>75</sub> = 40   | Perc <sub>75</sub> = 22   | Perc <sub>75</sub> = 47   |
| <b>SSA</b>                                                      | Median = 0.86             | Median = 0.87              | Median = 0.86             | Median = 0.86             | Median = 0.85             |
|                                                                 | Perc <sub>25</sub> = 0.82 | Perc <sub>25</sub> = 0.83  | Perc <sub>25</sub> = 0.81 | Perc <sub>25</sub> = 0.82 | Perc <sub>25</sub> = 0.81 |
|                                                                 | Perc <sub>75</sub> = 0.9  | Perc <sub>75</sub> = 0.9   | Perc <sub>75</sub> = 0.9  | Perc <sub>75</sub> = 0.89 | Perc <sub>75</sub> = 0.89 |
| <b><math>N_{10-550}</math> (<math>\text{cm}^{-3}</math>)</b>    | Median = 2155             | Median = 1828              | Median = 2600             | Median = 2500             | Median = 1870             |
|                                                                 | Perc <sub>25</sub> = 1377 | Perc <sub>25</sub> = 1099  | Perc <sub>25</sub> = 1734 | Perc <sub>25</sub> = 1650 | Perc <sub>25</sub> = 1225 |
|                                                                 | Perc <sub>75</sub> = 3176 | Perc <sub>75</sub> = 2826  | Perc <sub>75</sub> = 3632 | Perc <sub>75</sub> = 3537 | Perc <sub>75</sub> = 2695 |
| <b><math>N_{0.54-1.15}</math> (<math>\text{cm}^{-3}</math>)</b> | Median = 0.63             | Median = 0.7               | Median = 0.56             | Median = 0.54             | Median = 0.73             |
|                                                                 | Perc <sub>25</sub> = 0.23 | Perc <sub>25</sub> = 0.1   | Perc <sub>25</sub> = 0.21 | Perc <sub>25</sub> = 0.33 | Perc <sub>25</sub> = 0.23 |
|                                                                 | Perc <sub>75</sub> = 1.4  | Perc <sub>75</sub> = 2     | Perc <sub>75</sub> = 1.15 | Perc <sub>75</sub> = 0.88 | Perc <sub>75</sub> = 1.41 |
| <b><math>N_{1.15-4.5}</math> (<math>\text{cm}^{-3}</math>)</b>  | Median = 0.03             | Median = 0.01              | Median = 0.03             | Median = 0.05             | Median = 0.02             |
|                                                                 | Perc <sub>25</sub> = 0.01 | Perc <sub>25</sub> = 0.001 | Perc <sub>25</sub> = 0.01 | Perc <sub>25</sub> = 0.03 | Perc <sub>25</sub> = 0.01 |
|                                                                 | Perc <sub>75</sub> = 0.06 | Perc <sub>75</sub> = 0.35  | Perc <sub>75</sub> = 0.06 | Perc <sub>75</sub> = 0.07 | Perc <sub>75</sub> = 0.05 |
| <b><math>N_{ucfresh}</math> (<math>\text{cm}^{-3}</math>)</b>   | Median = 67               | Median = 51                | Median = 90               | Median = 90               | Median = 50               |
|                                                                 | Perc <sub>25</sub> = 20   | Perc <sub>25</sub> = 17    | Perc <sub>25</sub> = 26   | Perc <sub>25</sub> = 29   | Perc <sub>25</sub> = 13   |
|                                                                 | Perc <sub>75</sub> = 172  | Perc <sub>75</sub> = 123   | Perc <sub>75</sub> = 217  | Perc <sub>75</sub> = 222  | Perc <sub>75</sub> = 148  |
| <b><math>N_{ucaged}</math> (<math>\text{cm}^{-3}</math>)</b>    | Median = 302              | Median = 257               | Median = 370              | Median = 332              | Median = 277              |
|                                                                 | Perc <sub>25</sub> = 147  | Perc <sub>25</sub> = 122   | Perc <sub>25</sub> = 185  | Perc <sub>25</sub> = 147  | Perc <sub>25</sub> = 139  |
|                                                                 | Perc <sub>75</sub> = 593  | Perc <sub>75</sub> = 483   | Perc <sub>75</sub> = 715  | Perc <sub>75</sub> = 667  | Perc <sub>75</sub> = 540  |

|                               |                           |                           |                           |                           |                           |
|-------------------------------|---------------------------|---------------------------|---------------------------|---------------------------|---------------------------|
| <b>Ait (cm<sup>-3</sup>)</b>  | Median = 507              | Median = 402              | Median = 647              | Median = 586              | Median = 444              |
|                               | Perc <sub>25</sub> = 291  | Perc <sub>25</sub> = 237  | Perc <sub>25</sub> = 389  | Perc <sub>25</sub> = 312  | Perc <sub>25</sub> = 273  |
|                               | Perc <sub>75</sub> = 871  | Perc <sub>75</sub> = 686  | Perc <sub>75</sub> = 1063 | Perc <sub>75</sub> = 1089 | Perc <sub>75</sub> = 733  |
| <b>Acc1 (cm<sup>-3</sup>)</b> | Median = 762              | Median = 700              | Median = 864              | Median = 829              | Median = 675              |
|                               | Perc <sub>25</sub> = 407  | Perc <sub>25</sub> = 347  | Perc <sub>25</sub> = 479  | Perc <sub>25</sub> = 445  | Perc <sub>25</sub> = 360  |
|                               | Perc <sub>75</sub> = 1240 | Perc <sub>75</sub> = 1265 | Perc <sub>75</sub> = 1339 | Perc <sub>75</sub> = 1293 | Perc <sub>75</sub> = 1083 |
| <b>Acc2 (cm<sup>-3</sup>)</b> | Median = 120              | Median = 142              | Median = 127              | Median = 91               | Median = 136              |
|                               | Perc <sub>25</sub> = 53   | Perc <sub>25</sub> = 51   | Perc <sub>25</sub> = 59   | Perc <sub>25</sub> = 48   | Perc <sub>25</sub> = 53   |
|                               | Perc <sub>75</sub> = 228  | Perc <sub>75</sub> = 286  | Perc <sub>75</sub> = 228  | Perc <sub>75</sub> = 159  | Perc <sub>75</sub> = 240  |

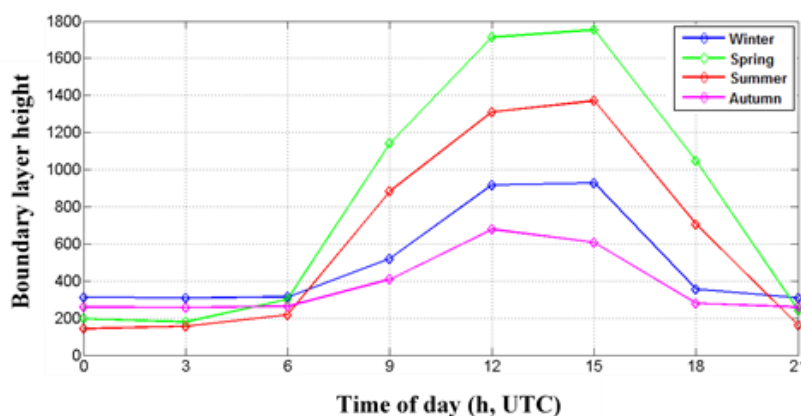

**Figure S1.** Diurnal variation of the boundary layer height at OPE (computed with ECMWF ERA-Interim data for the year 2012 to 2018) averaged over the four seasons.

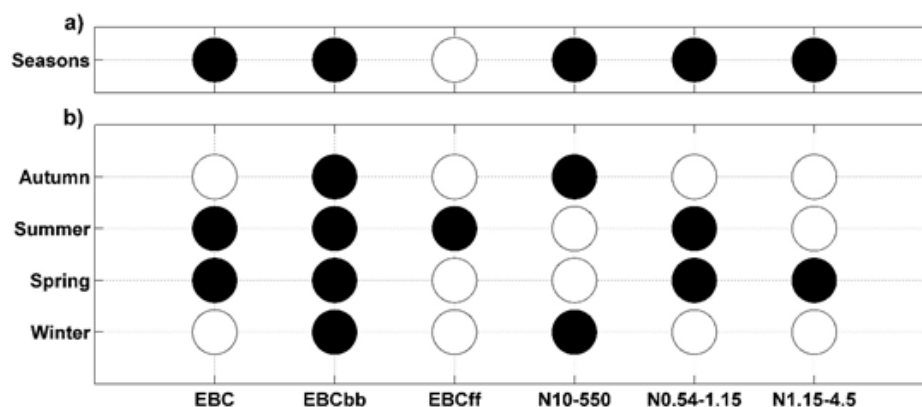

**Figure S2.** The Wilcoxon–Mann–Whitney test applied on EBC, EBC<sub>bb</sub>, EBC<sub>ff</sub>, N<sub>10-550</sub>, N<sub>0.54-1.15</sub>, N<sub>1.15-4.5</sub> concentrations measured for each season. The circles are black (white) when: (a) the cold seasons median are significantly different (equal) from the warm seasons medians; (b) the daytime medians are significantly different (equal) from the nighttime medians, with a threshold of 5%.

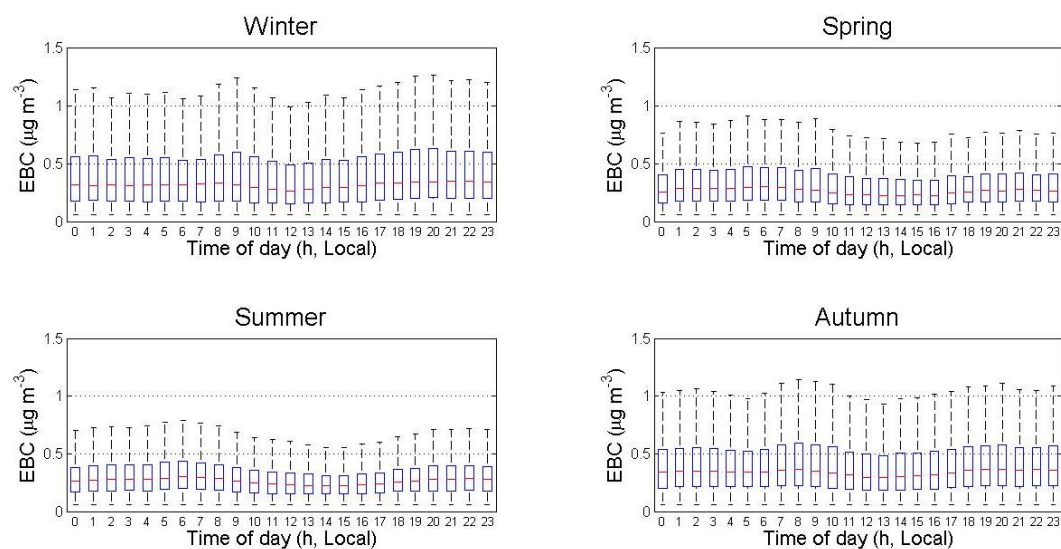

**Figure S3.** Seasonal median daily variation of EBC ( $\mu\text{g m}^{-3}$ ) for each season at OPE. Red lines represent the median value, bottom and top sides of the boxes symbolize the 25th and 75th percentile respectively. The length of the whiskers represent  $1.5\times$  interquartile range which includes 99.3% of the data.

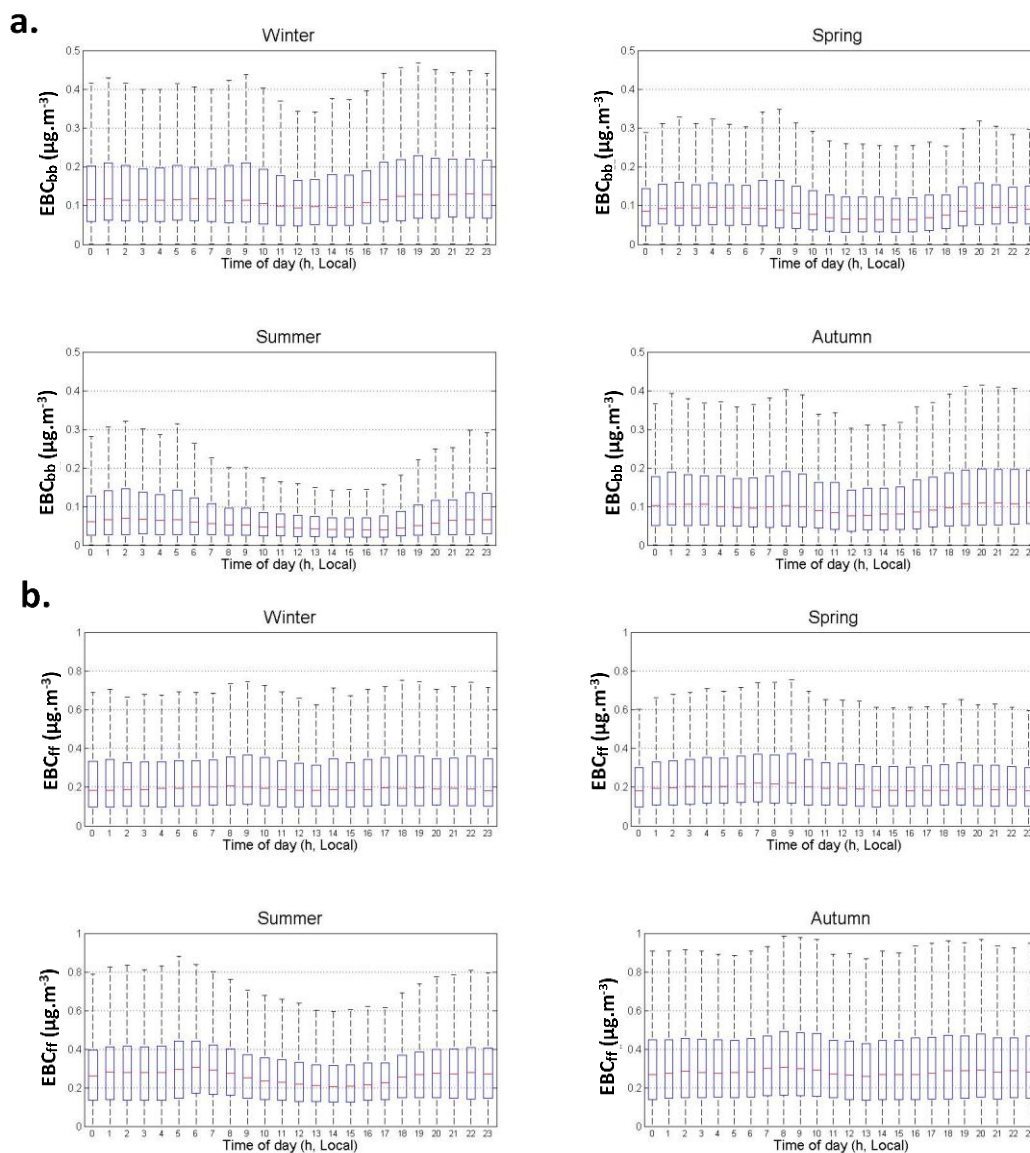

**Figure S4.** Seasonal median daily variations of (a)  $EBC_{bb}$  and (b)  $EBC_{ff}$  for each season. Red lines represent the median value, bottom and top sides of the boxes symbolize the 25th and 75th percentile respectively. The length of the whiskers represent 1.5× interquartile range which includes 99.3% of the data.

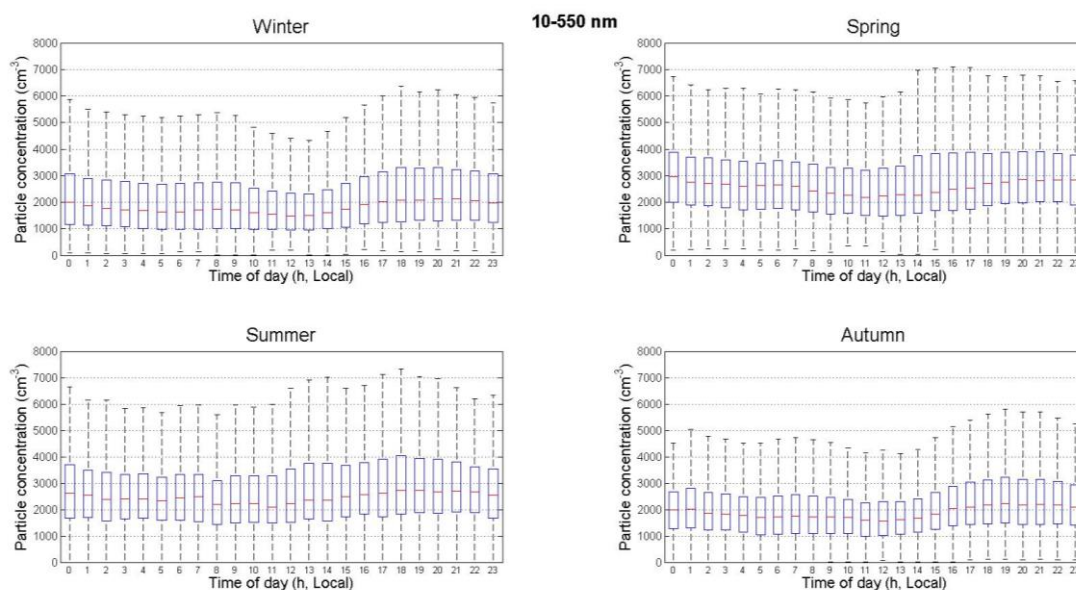

**Figure S5.** Seasonal median daily variations of the total particle concentration  $\text{cm}^{-3}$  of diameter between 10 and 550 nm for each season. Red lines represent the median value, bottom and top sides of the boxes symbolize the 25th and 75th percentile respectively. The length of the whiskers represent  $1.5 \times$  interquartile range which includes 99.3% of the data.

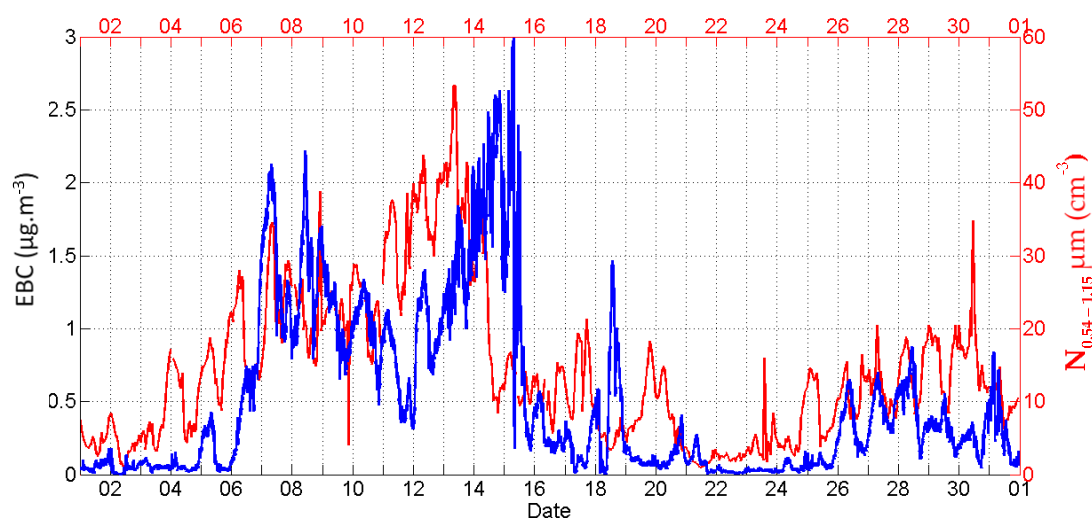

**Figure S6.** Time series of EBC (Blue) and total particle number concentration of diameter between 0.54 and 1.15  $\mu\text{m}$  ( $N_{0.54-1.15 \mu\text{m}}$ ): Red, in March 2014 at OPE.

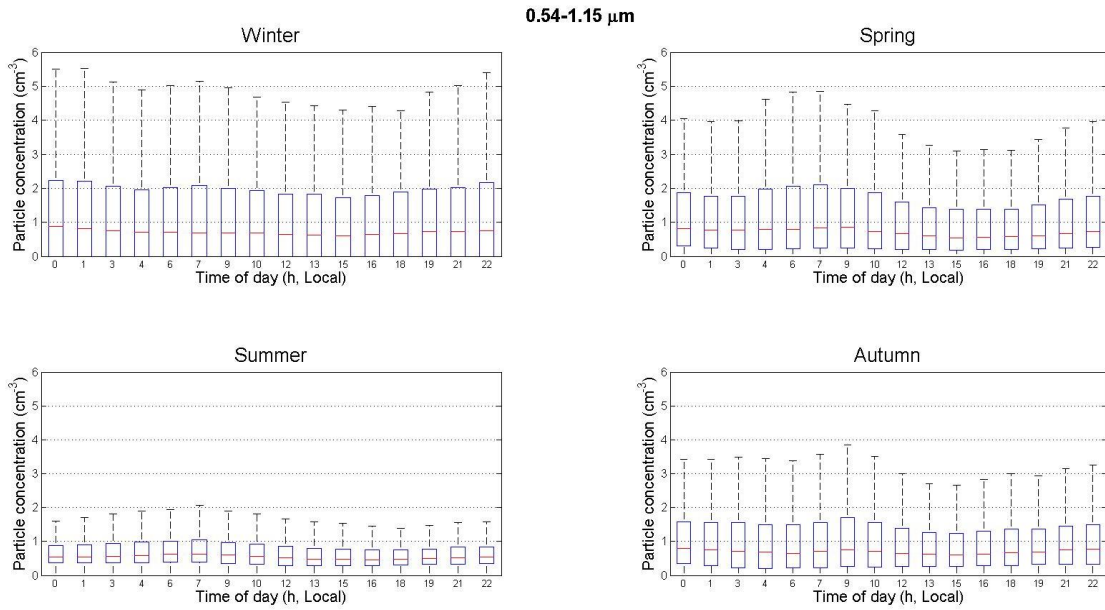

**Figure S7.** Seasonal median daily variations of the total particle number concentration of diameter between 0.54 and 1.15  $\mu\text{m}$  for each season. Red lines represent the median value, bottom and top sides of the boxes symbolize the 25th and 75th percentile respectively. The length of the whiskers represent 1.5 $\times$  interquartile range which includes 99.3% of the data.

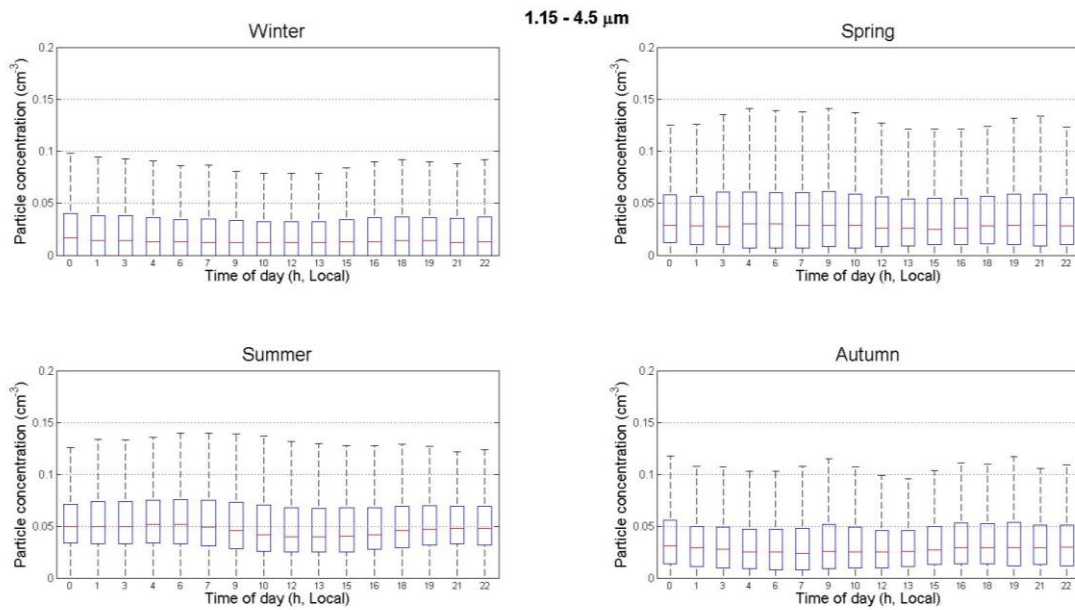

**Figure S8.** Seasonal median daily variations of the total particle number concentration of diameter between 1.15 and 4.5  $\mu\text{m}$  for each season. Red lines represent the median value, bottom and top sides of the boxes symbolize the 25th and 75th percentile respectively. The length of the whiskers represent 1.5 $\times$  interquartile range which includes 99.3% of the data.



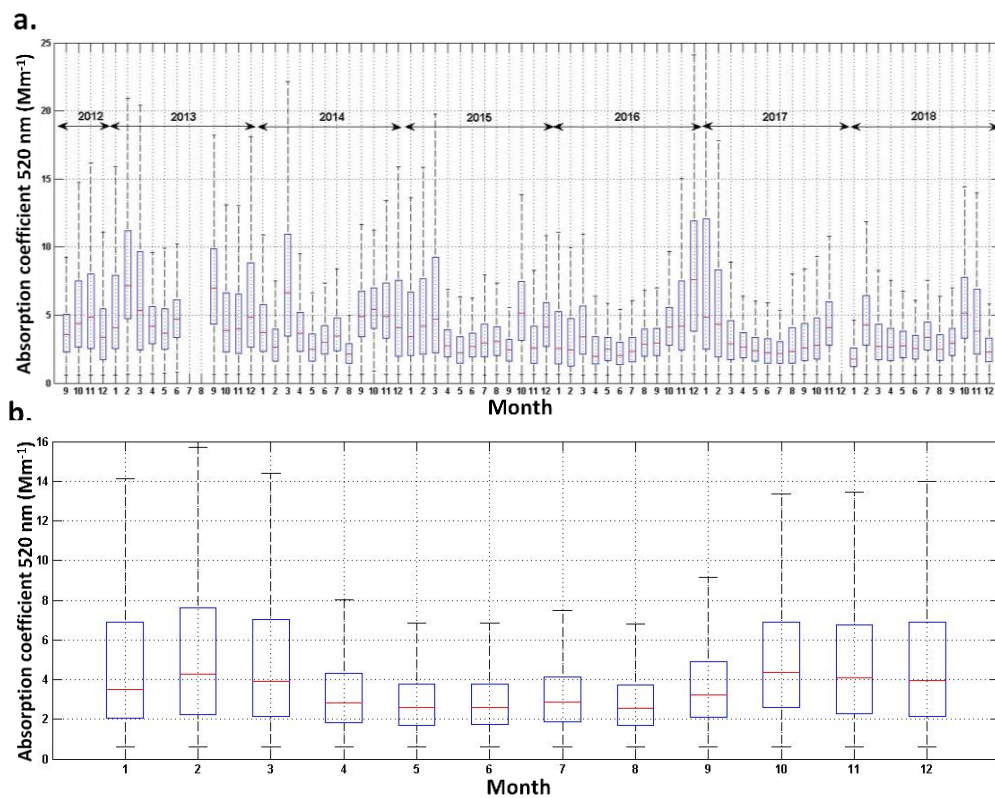

**Figure S9.** (a) Evolution of the absorption coefficient at 520 nm over the entire measurement period; (b) seasonal median variations of this same parameter. Red lines represent the median value, bottom and top sides of the boxes symbolize the 25th and 75th percentile respectively and the extremities of the black lines are the 10th and 90th percentile.

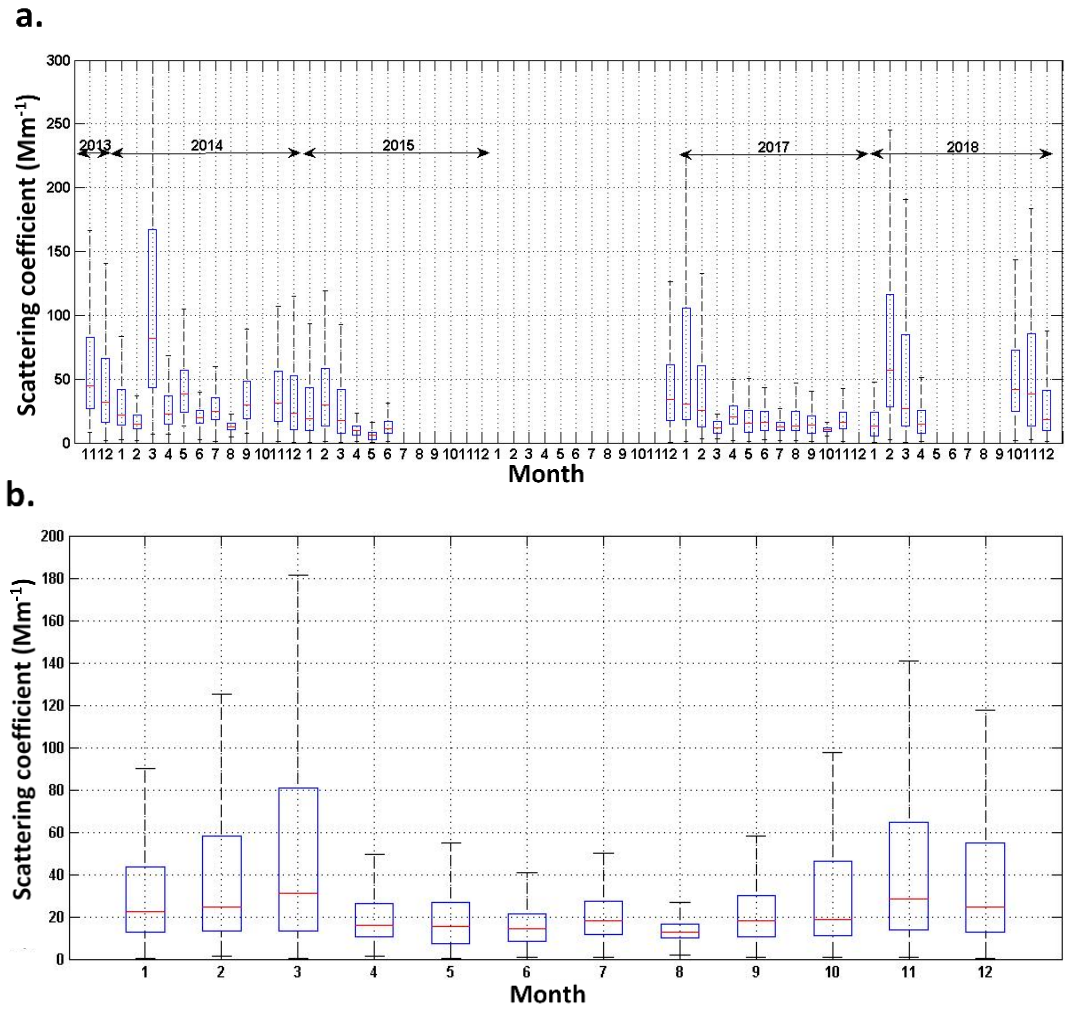

**Figure S10.** (a) Evolution of the scattering coefficient at 525 nm over the entire measurement period; (b) seasonal median variations of this same parameter. Red lines represent the median value, bottom and top sides of the boxes symbolize the 25th and 75th percentile respectively. The length of the whiskers represent 1.5× interquartile range which includes 99.3% of the data.



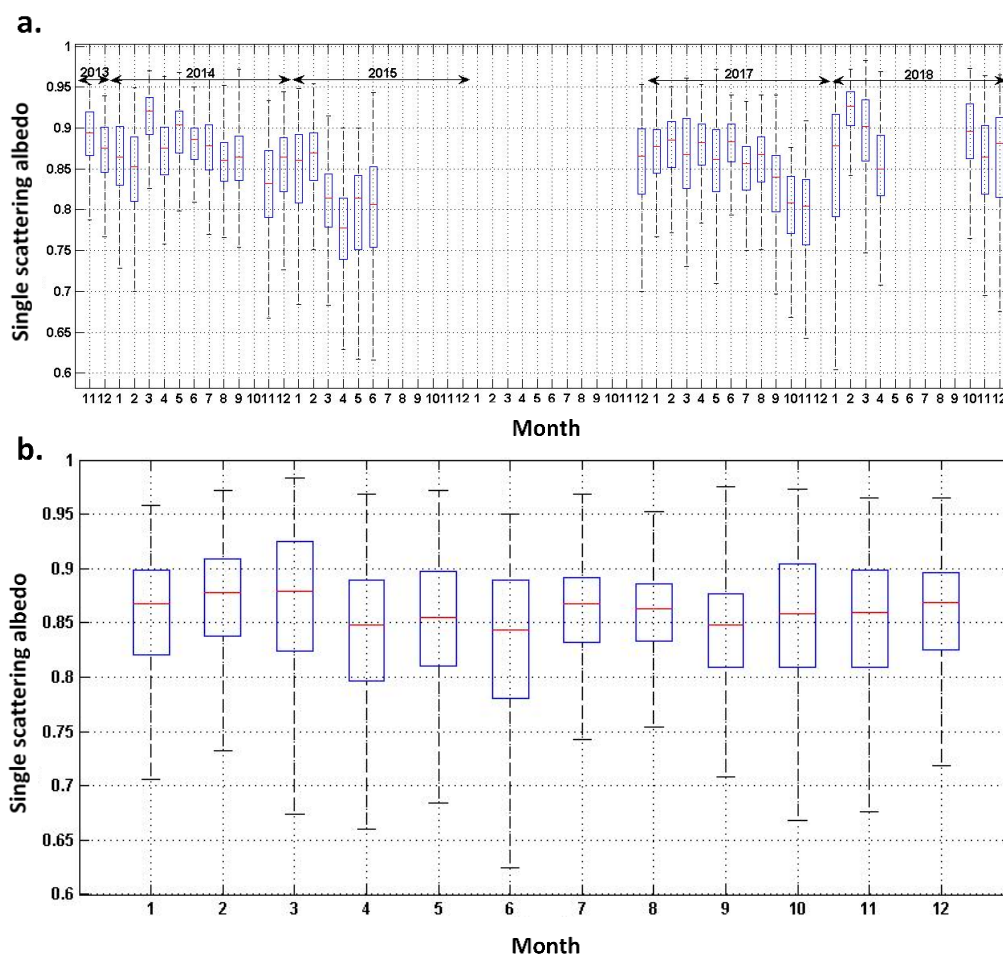

**Figure S11.** (a) Evolution of the single scattering albedo over the entire measurement period; (b) seasonal median variations of this same parameter. Red lines represent the median value, bottom and top sides of the boxes symbolize the 25th and 75th percentile respectively. The length of the whiskers represent 1.5x interquartile range which includes 99.3% of the data.

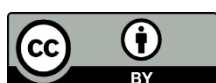

© 2020 by the author. Licensee MDPI, Basel, Switzerland. This article is an open access article distributed under the terms and conditions of the Creative Commons Attribution (CC BY) license (<http://creativecommons.org/licenses/by/4.0/>).
